# Supplementary material for: Hylotelephium maximum from Coastal Drift Lines Is a Promising Zn and Mn Accumulator with a High Tolerance against Biogenous Heavy Metals
Source: MDPI journal article supplement (doi:10.3390/stresses2040031), 2022-11-25
Supplement: s1 [file s1]

Archive with 1 entries (1 files):
- stresses-2064409-supplementary.pdf
