# Supplementary material for: Hylotelephium maximum from Coastal Drift Lines Is a Promising Zn and Mn Accumulator with a High Tolerance against Biogenous Heavy Metals
Source: MDPI journal article supplement (doi:10.3390/stresses2040031), 2022-11-25
Supplement: s1 [file s1 › stresses-2064409-supplementary.pdf]

***Hylotelephium maximum* from Coastal Drift Lines is a Promising Zn- and Mn-accumulator with a High Tolerance Against Biogenous Heavy Metals**

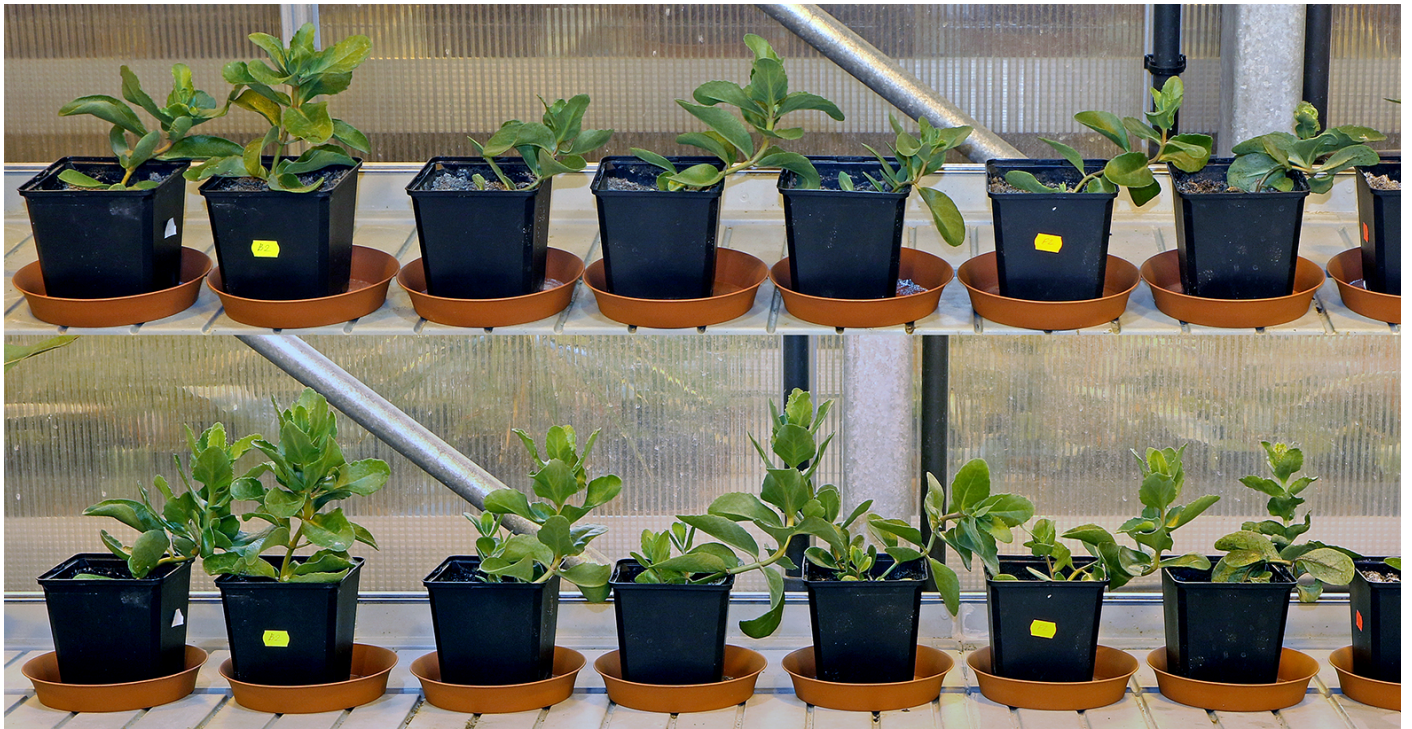

**Figure S1.** Typical *Hylotelephium maximum* plants 2 (above) and 4 (below) weeks after full treatment. From left to right, control, 0.1 g L<sup>-1</sup> Cu, 1.0 g L<sup>-1</sup> Cu, 0.2 g L<sup>-1</sup> Zn, 1.0 g L<sup>-1</sup> Zn, 0.2 g L<sup>-1</sup> Mn, 1.0 g L<sup>-1</sup> Mn in substrate.

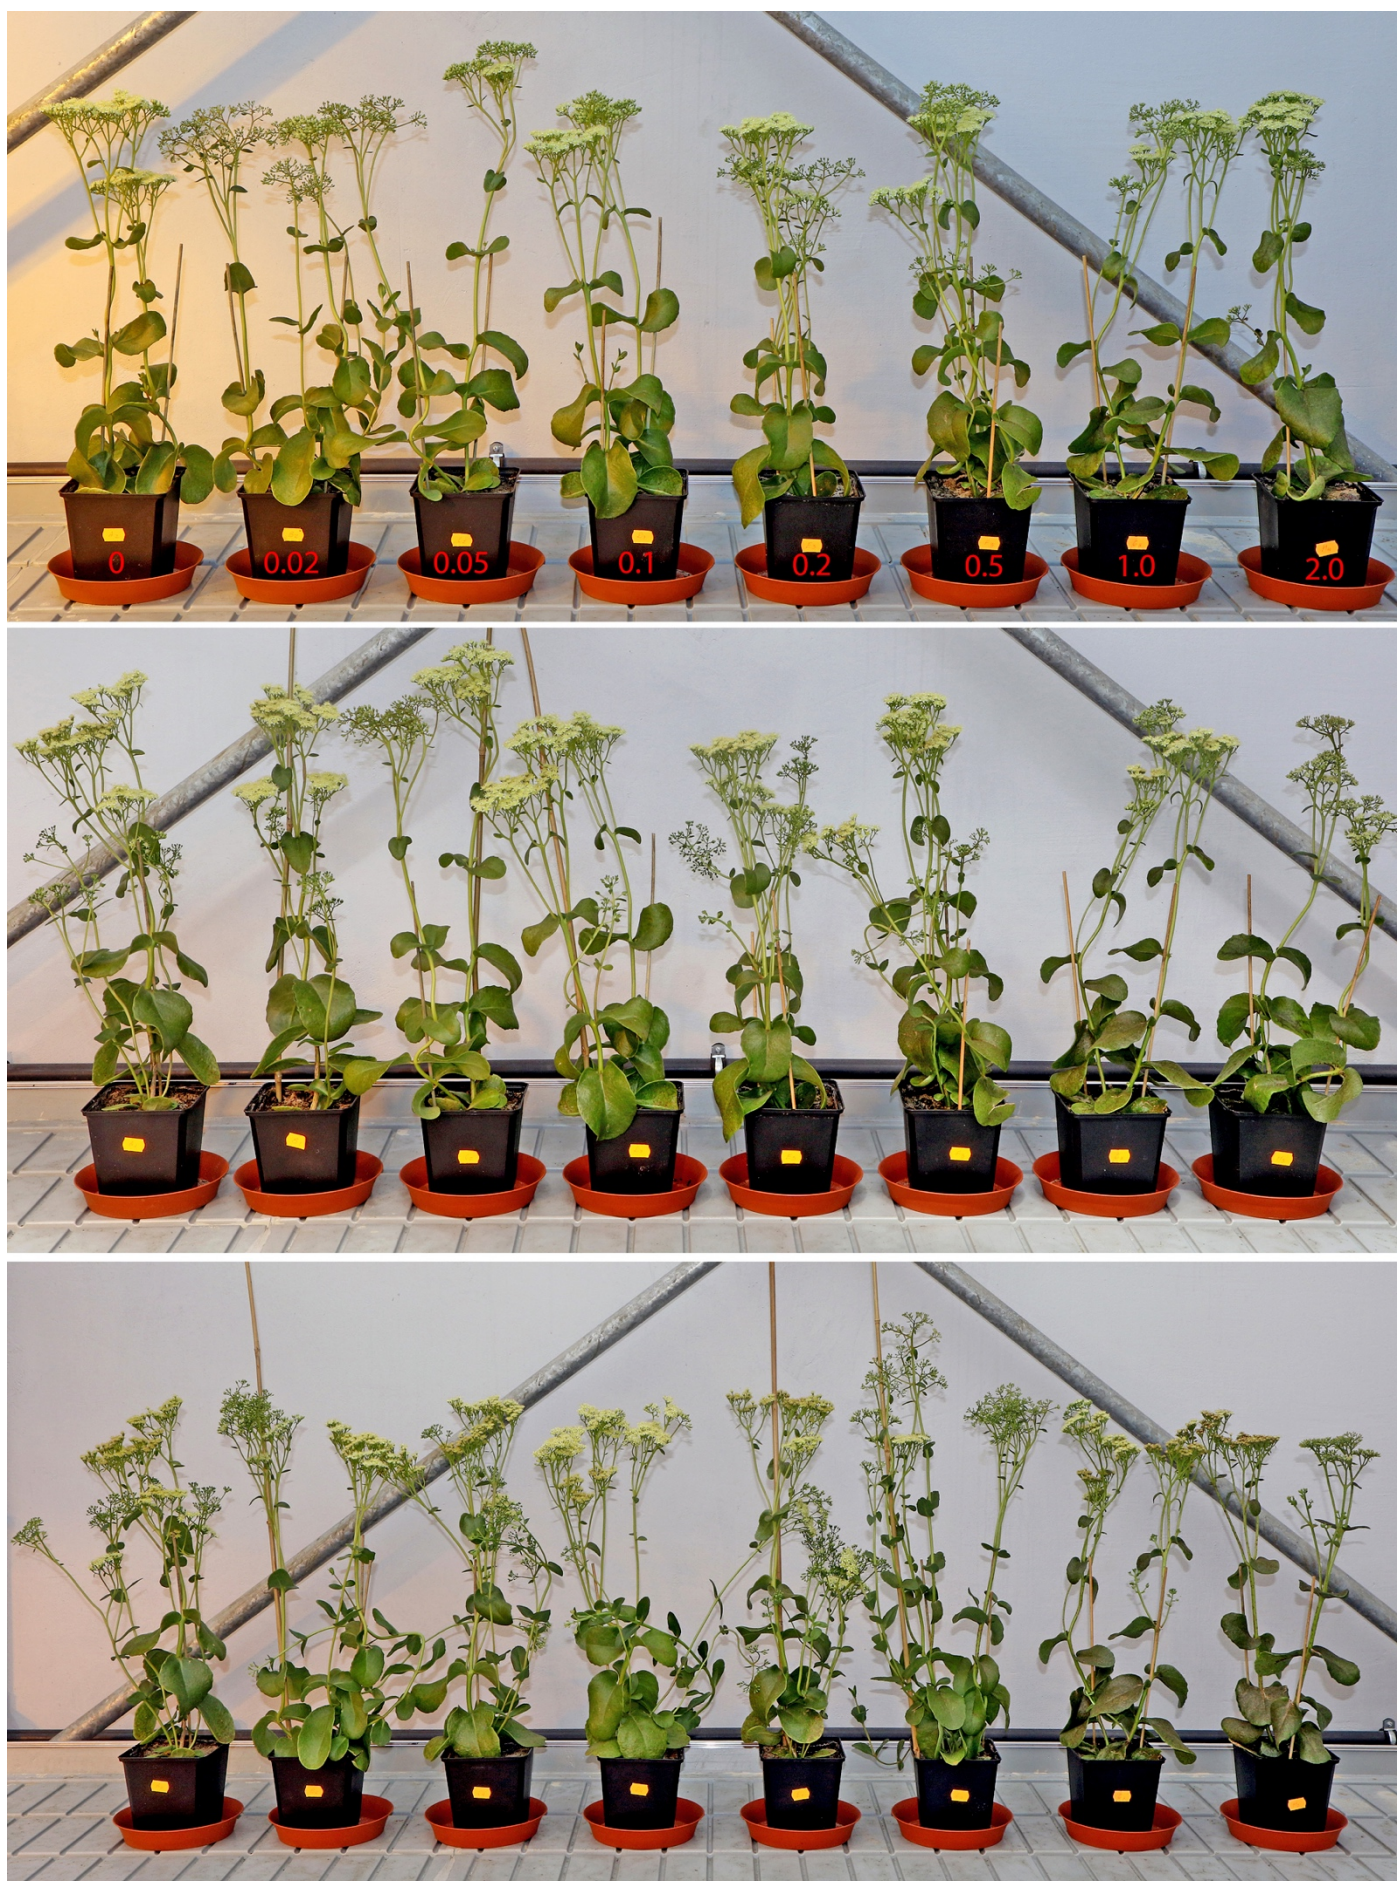

**Figure S2.** Typical *Hylotelephium maximum* plants 5 (above), 6 (middle), 8 (below) weeks after full treatment. Red numbers indicate dose of Mn (g L<sup>-1</sup> of substrate).
